# Supplementary material for: Assessment of the Bacteriocinogenic Potential of Marine Bacteria Reveals Lichenicidin Production by Seaweed-Derived Bacillus spp
Source: PubMed Central journal article supplement (PMC3497023; doi:10.3390/md10102280), 2012-10-18
Supplement: marinedrugs-10-02280-s001.pdf [file marinedrugs-10-02280-s001.pdf]

## Supplementary Information

**Figure S1.** Phylogenetic tree of antimicrobial-producing marine bacteria based on comparison of partial 16S rRNA gene sequences using the neighbor-joining method. The tree includes strain relatives to isolates determined by BLAST search. Out grouping was performed with *Clostridium*. <sup>a</sup> Marine isolates subsequently shown to produce lichenicidin as well as a known lichenicidin producer are shown in bold; <sup>b</sup> Denotes isolates with identical genetic fingerprints.

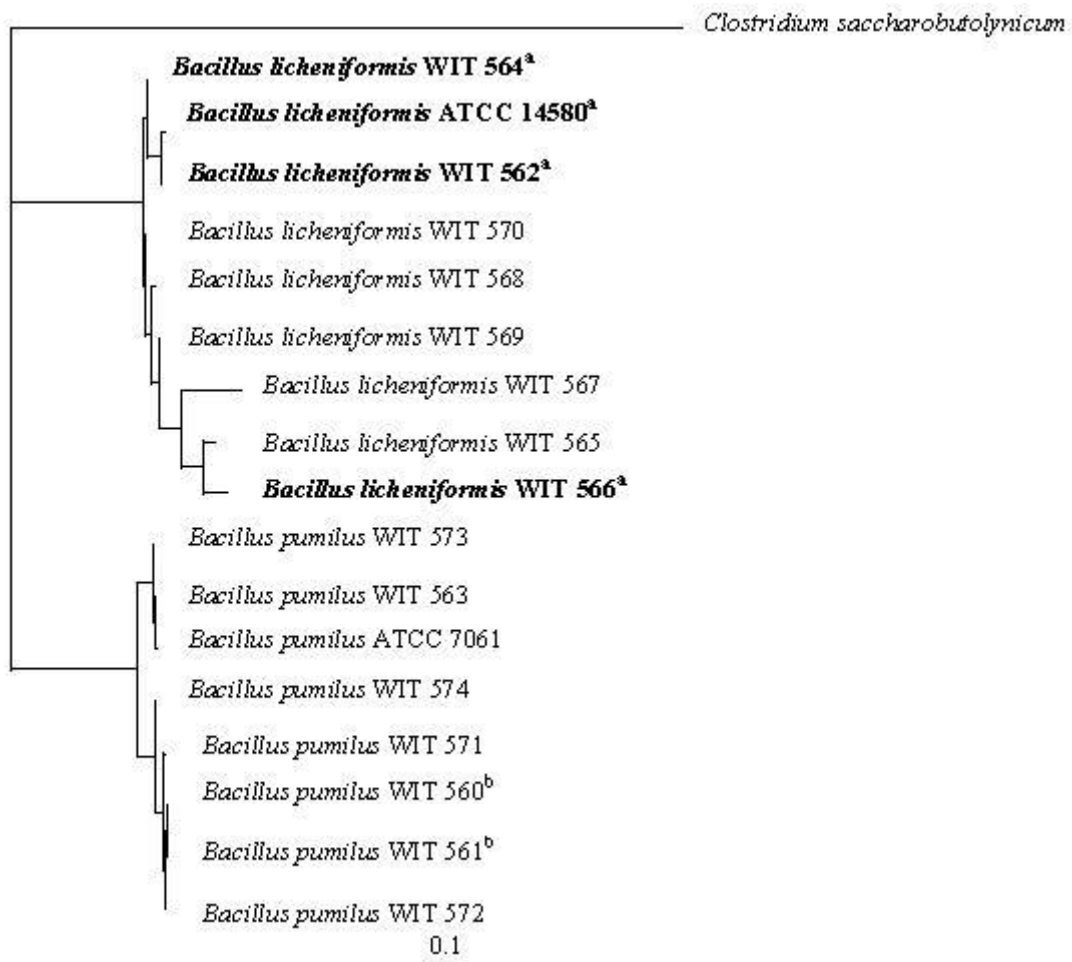

**Figure S2.** Representative PFGE patterns of *NotI*-digested genomic DNA from antimicrobial-producing *Bacillus* isolates. M: Low-range molecular weight marker; lane 1: WIT 560; lane 2: WIT 561; lane 3: WIT 562; lane 4: WIT 563; lane 5: WIT 564; lane 6: WIT 565; lane 7: WIT 566; lane 8: WIT 567; lane 9: WIT 568, lane 10: WIT 569; lane 11: WIT 570; lane 12: WIT 571; lane 13: WIT 572; lane 14: WIT 573, lane 15: WIT 574. <sup>a</sup> Denotes isolates with identical genetic fingerprints; <sup>b</sup> Isolates subsequently shown to produce lichenicidin.

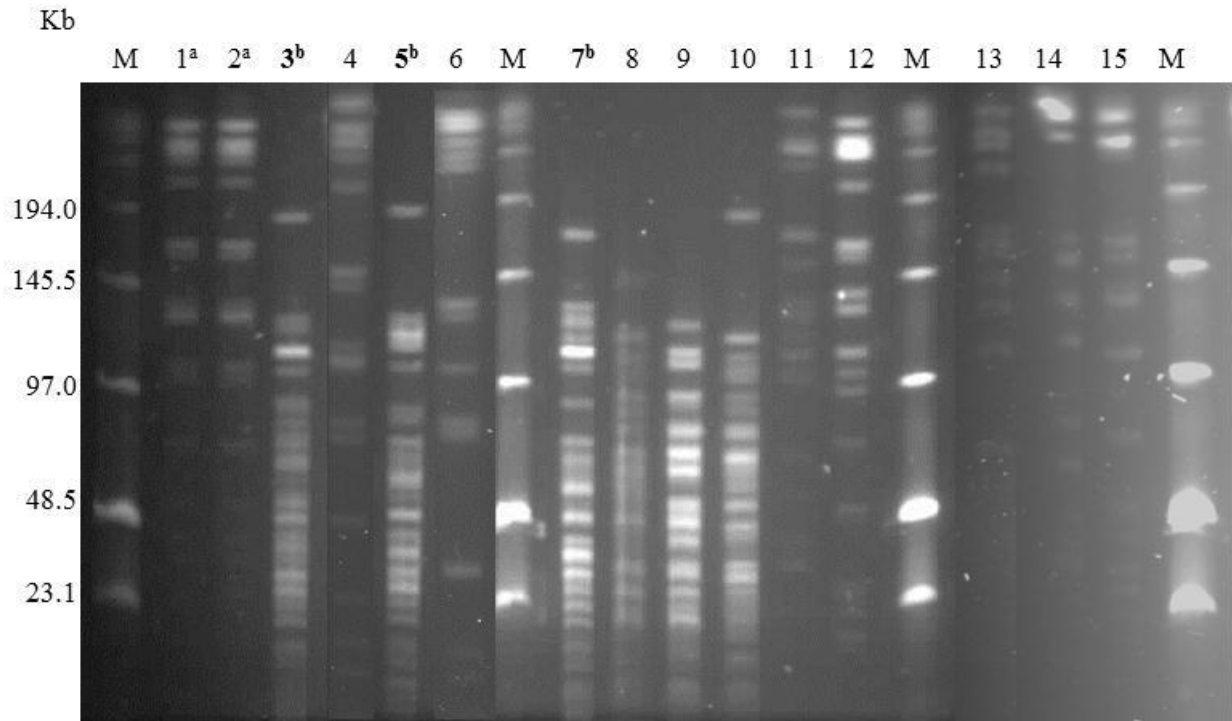

**Table S1.** Antimicrobial activity of marine isolates cultured using a range of different growth media <sup>a</sup>.

| Test Strain                 | BHI broth | Luria Bertani broth | Marine broth | Nutrient broth | <i>Bacillus</i> production medium | Tryptic soy broth | Actinomycete isolation broth |
|-----------------------------|-----------|---------------------|--------------|----------------|-----------------------------------|-------------------|------------------------------|
| <b>WIT 562</b> <sup>b</sup> | +         | +                   | ++++         | ++++           | ++++                              | +                 | ++++                         |
| <b>WIT 564</b> <sup>b</sup> | ++        | ++                  | ++++         | ++++           | ++++                              | ++                | +++                          |
| <b>WIT 566</b> <sup>b</sup> | +         | +++                 | ++++         | ++++           | ++++                              | -                 | +                            |
| WIT 560 <sup>c</sup>        | ++        | +                   | ++++         | +++            | +++                               | +                 | -                            |
| WIT 561 <sup>c</sup>        | ++        | -                   | +++          | +++            | +++                               | +                 | -                            |
| WIT 563                     | +++       | -                   | +++          | +++            | +                                 | +                 | -                            |
| WIT 565                     | ++        | ++                  | ++++         | ++++           | ++++                              | -                 | -                            |
| WIT 567                     | ++        | ++                  | ++++         | +++            | ++++                              | ++                | ++                           |
| WIT 568                     | ++++      | ++++                | ++++         | ++++           | ++++                              | ++++              | +++                          |
| WIT 569                     | +++       | +++                 | ++++         | ++++           | ++++                              | +++               | ++                           |
| WIT 570                     | ++++      | ++++                | ++++         | ++++           | ++++                              | ++++              | ++++                         |
| WIT 571                     | ++        | -                   | ++           | ++             | ++                                | ++                | -                            |
| WIT 572                     | ++        | -                   | ++++         | +++            | +++                               | -                 | -                            |
| WIT 573                     | +         | -                   | ++           | +++            | ++                                | +                 | -                            |
| WIT 574                     | ++        | +                   | ++           | ++             | ++                                | +                 | -                            |

<sup>a</sup> Mean radii of zones of inhibition from cell-free supernatant assayed against *L. lactis* HP or *Lb. bulgaricus* LMG 6901 in triplicate well diffusion assays. + = 0.1–1 mm, ++ = 1.1–2 mm, +++ = 2.1–3 mm, ++++ > 3 mm; - = no antimicrobial activity;

<sup>b</sup> Isolates subsequently shown to produce lichenicidin are grouped together and shown in bold; <sup>c</sup> Denotes isolates with identical genetic fingerprints.

**Table S2.** Cross-sensitivity assay of antimicrobial-producing marine isolates against each other and known bacteriocin-producing strains <sup>a</sup>.

| Test strain                            | WIT 560 | WIT 561 | WIT 562 | WIT 563 | WIT 564 | WIT 565 | WIT 566 | WIT 567 | WIT 568 | WIT 569 | WIT 570 | WIT 571 | WIT 572 | WIT 573 | WIT 574 | <i>B. subtilis</i> <sup>b</sup> | <i>B. licheniformis</i> <sup>c</sup> | <i>B. halodurans</i> <sup>d</sup> | <i>B. megaterium</i> <sup>e</sup> | <i>B. cereus</i> <sup>f</sup> |
|----------------------------------------|---------|---------|---------|---------|---------|---------|---------|---------|---------|---------|---------|---------|---------|---------|---------|---------------------------------|--------------------------------------|-----------------------------------|-----------------------------------|-------------------------------|
| <b>WIT 562</b> <sup>g</sup>            | -       | -       | -       | -       | -       | -       | -       | -       | -       | -       | -       | -       | -       | -       | +       | -                               | -                                    | +++                               | ++                                | -                             |
| <b>WIT 564</b> <sup>g</sup>            | +++     | +++     | +++     | ++++    | -       | ++++    | ++++    | ++      | ++      | ++      | +++     | +++     | +++     | +++     | +++     | +                               | ++                                   | ++++                              | +++                               | -                             |
| <b>WIT 566</b> <sup>g</sup>            | ++      | ++      | -       | -       | -       | -       | -       | -       | -       | +       | -       | +       | +       | +       | +       | +                               | -                                    | ++++                              | ++                                | -                             |
| WIT 560 <sup>h</sup>                   | -       | -       | ++      | +       | -       | -       | -       | ++      | -       | -       | +       | +       | -       | +       | +       | -                               | -                                    | ++                                | -                                 | -                             |
| WIT 561 <sup>h</sup>                   | -       | -       | ++      | +       | -       | -       | -       | ++      | -       | -       | +       | -       | -       | +       | -       | -                               | -                                    | ++                                | -                                 | -                             |
| WIT 563                                | -       | -       | ++      | -       | -       | -       | -       | ++      | -       | -       | -       | +       | +       | +       | -       | -                               | -                                    | +++                               | -                                 | -                             |
| WIT 565                                | ++      | ++      | -       | -       | -       | -       | -       | -       | -       | +       | -       | +       | ++      | +       | +       | +                               | -                                    | ++                                | -                                 | -                             |
| WIT 567                                | -       | -       | -       | -       | -       | -       | -       | -       | -       | -       | -       | -       | -       | -       | -       | +                               | ++                                   | +++                               | ++                                | -                             |
| WIT 568                                | +++     | +++     | +       | +++     | ++      | ++      | ++      | -       | -       | -       | +++     | +++     | +++     | +++     | +++     | +                               | ++                                   | ++++                              | ++                                | -                             |
| WIT 569                                | +++     | +++     | +       | +++     | ++      | +++     | ++      | -       | -       | -       | +++     | +++     | +++     | +++     | +++     | +                               | ++                                   | ++++                              | ++                                | -                             |
| WIT 570                                | ++++    | ++++    | +++     | ++++    | +       | +++     | +       | ++      | +       | +       | -       | ++++    | ++      | ++++    | ++      | -                               | ++                                   | +++                               | +++                               | +                             |
| WIT 571                                | -       | -       | ++      | +       | -       | -       | -       | ++      | -       | -       | +       | -       | -       | +       | -       | -                               | -                                    | ++                                | -                                 | -                             |
| WIT 572                                | -       | -       | ++      | +       | -       | -       | -       | ++      | -       | -       | +       | -       | -       | +       | -       | -                               | -                                    | ++                                | -                                 | -                             |
| WIT 573                                | -       | -       | -       | -       | -       | -       | -       | +       | -       | -       | -       | -       | -       | -       | -       | -                               | -                                    | ++++                              | -                                 | -                             |
| WIT 574                                | -       | -       | -       | +       | -       | -       | -       | -       | -       | -       | -       | -       | -       | +       | -       | -                               | -                                    | +                                 | -                                 | -                             |
| <i>B. subtilis</i> <sup>b</sup>        | +++     | +++     | -       | +++     | -       | +++     | -       | -       | -       | -       | +++     | ++      | +++     | ++      | +++     | -                               | +                                    | ++++                              | ++++                              | +                             |
| <i>B. licheniformis</i> <sup>c</sup>   | -       | -       | -       | -       | -       | -       | -       | -       | -       | -       | -       | -       | -       | -       | -       | -                               | -                                    | -                                 | -                                 | -                             |
| <i>B. halodurans</i> <sup>d</sup>      | -       | -       | -       | -       | -       | -       | -       | -       | -       | -       | -       | -       | -       | -       | -       | -                               | -                                    | -                                 | -                                 | -                             |
| <i>B. megaterium</i> <sup>e</sup>      | -       | -       | -       | -       | -       | -       | -       | -       | -       | -       | -       | -       | -       | -       | -       | -                               | -                                    | -                                 | -                                 | -                             |
| <i>B. cereus</i> <sup>f</sup>          | -       | -       | -       | -       | -       | -       | -       | -       | -       | -       | -       | -       | -       | -       | -       | -                               | +                                    | ++++                              | -                                 | -                             |
| <i>Lc. lactis</i> NZ 9700 <sup>i</sup> | ++      | ++      | ++      | ++      | ++      | ++      | +++     | +       | +       | ++      | ++      | ++      | ++      | +       | ++      | +                               | ND                                   | ND                                | ND                                | ND                            |

<sup>a</sup> Mean radii of zones of inhibition from cell-free supernatant analyzed in triplicate in well diffusion assays. + = 0.1–1 mm, ++ = 1.1–2 mm, +++ = 2.1–3 mm, ++++ > 3 mm; - = no antimicrobial activity. ND = not determined; <sup>b</sup> ATCC 6633 (subtilin producer); <sup>c</sup> ATCC 14580 (lichenicidin producer); <sup>d</sup> ATCC BAA-125D-5 (haloduracin producer); <sup>e</sup> 216 (megacin A-216 producer); <sup>f</sup> CECT 5148 (cerein 7B producer); <sup>g</sup> Isolates subsequently shown to produce lichenicidin are grouped together and shown in bold; <sup>h</sup> Denotes isolates with identical genetic fingerprints; <sup>i</sup> *Lc. lactis* NZ 9700 (nisin producer).

**Table S3.** Bacterial strains used in this study as indicators for antimicrobial characterization and as positive controls for bacteriocin production and their growth conditions.

| Bacterial strain                                     | Use in this study                                              | Growth medium               | Incubation temperature ( °C) | Growth conditions             |
|------------------------------------------------------|----------------------------------------------------------------|-----------------------------|------------------------------|-------------------------------|
| <i>Listeria innocua</i> WIT 361                      | Indicator                                                      | BHI <sup>a</sup>            | 37                           | Aerobic                       |
| <i>L. monocytogenes</i> WIT 041                      | Indicator                                                      | BHI                         | 37                           | Aerobic                       |
| <i>Staphylococcus aureus</i> DPC 5246                | Indicator                                                      | BHI                         | 37                           | Aerobic                       |
| Methicillin resistant <i>S. aureus</i> (MRSA) W73365 | Indicator                                                      | BHI                         | 37                           | Aerobic                       |
| <i>Lactococcus lactis</i> HP                         | Indicator                                                      | LM17 <sup>b</sup>           | 28                           | Aerobic                       |
| <i>Lc. lactis</i> NZ 9700                            | Positive control (nisin producer)                              | GM17 <sup>c</sup>           | 28                           | Aerobic                       |
| <i>Lc. lactis</i> DPC 3147                           | Positive control (lacticin 3147 producer)                      | GM17                        | 28                           | Aerobic                       |
| <i>Enterococcus faecium</i> ATCC 19434               | Indicator                                                      | MRS + cysteine <sup>d</sup> | 37                           | Aerobic                       |
| <i>Enterococcus faecalis</i> ATCC 19433              | Indicator                                                      | MRS + cysteine              | 37                           | Aerobic                       |
| <i>Lactobacillus bulgaricus</i> LMG 6901             | Indicator                                                      | MRS + cysteine              | 37                           | Anaerobic                     |
| <i>Clostridium difficile</i> ATCC 43593              | Indicator                                                      | RCM <sup>e</sup>            | 37                           | Anaerobic                     |
| <i>Bacillus halodurans</i> ATCC BAA-125D-5           | Indicator, positive control (haloduracin A1 & A2 producer)     | BHI                         | 37                           | Aerobic, 200 rpm              |
| <i>Bacillus cereus</i> CECT 5148                     | Indicator, positive control (cerein 7B producer)               | BHI                         | 37                           | Aerobic, 200 rpm              |
| <i>Bacillus licheniformis</i> ATCC 14580             | Indicator, positive control (lichenicidin producer)            | BHI                         | 37                           | Aerobic, 200 rpm              |
| <i>Bacillus megaterium</i> 216                       | Indicator, positive control (megacin A-216 producer)           | BHI                         | 37                           | Aerobic, 200 rpm              |
| <i>Bacillus subtilis</i> ATCC 6633                   | Indicator, positive control (subtilin and subtilisin producer) | BHI                         | 37                           | Aerobic, 200 rpm <sup>f</sup> |
| <i>B. subtilis</i> A1/3                              | Indicator, positive control (ericin A producer)                | BHI                         | 37                           | Aerobic, 200 rpm              |
| <i>B. subtilis</i> 168 (ATCC 23857)                  | Indicator, positive control (sublancin producer)               | BHI                         | 30                           | Aerobic, 200 rpm              |
| <i>B. subtilis</i> HIL Y85,54728                     | Indicator, positive control (mersacidin producer)              | BHI                         | 37                           | Aerobic, 200 rpm              |
| <i>Bacillus thuringiensis</i> NEB 17                 | Indicator, positive control (thuricin 17 producer)             | BHI                         | 28                           | Aerobic, 200 rpm              |
| <i>E. coli</i> DSM 10720                             | Indicator                                                      | BHI                         | 37                           | Aerobic                       |
| <i>Salmonella</i> Typhimurium LT2                    | Indicator                                                      | BHI                         | 37                           | Aerobic                       |
| <i>Pseudomonas aeruginosa</i> PA01                   | Indicator                                                      | BHI                         | 28                           | Aerobic                       |
| <i>Cronobacter sakazakii</i> ATCC 12868              | Indicator                                                      | BHI                         | 37                           | Aerobic                       |

<sup>a</sup> Brain heart infusion (BHI; Oxoid, Basingstroke, Hampshire, UK); <sup>b</sup> LM17 [M17 (Oxoid) containing 0.5% (w/v) lactose]; <sup>c</sup> GM17 [M17 containing 0.5% (w/v) glucose]; <sup>d</sup> de Man, Rogosa and Sharpe (MRS) [(Becton, Dickinson and Company (BD), Franklin Lakes, USA) supplemented with 0.05% (w/v) L-cysteine]; <sup>e</sup> Reinforced clostridial medium (RCM; Merck, Darmstadt, Germany); <sup>f</sup> Broths were incubated with shaking at 200 rpm.
